# Supplementary material
Source: Research Square preprint supplement (doi:10.21203/rs.3.rs-9074906/v1)
Supplement: Supplementary file 1 [file 3efe3361c9b0536964b5d112.pdf]

## All available data in this manuscript

| Well | Fluor | Target | Sample | Cq    | $\Delta Cq$       | $\Delta\Delta Cq$ |
|------|-------|--------|--------|-------|-------------------|-------------------|
| 01   | SYBR  | Ctsk   | WT     | 17.05 |                   |                   |
| 02   | SYBR  | Ctsk   | WT     | 17.05 |                   |                   |
| 03   | SYBR  | Ctsk   | WT     | 17.03 |                   |                   |
| 04   | SYBR  | Ctsk   | A      | 17.42 | 0.378530246013202 | 0.378274250626769 |
| 05   | SYBR  | Ctsk   | A      | 17.40 | 0.356336751581303 |                   |
| 06   | SYBR  | Ctsk   | A      | 17.44 | 0.399955754285802 |                   |
| 07   | SYBR  | Ctsk   | B      | 21.11 | 4.0647323746067   | 3.2177048931966   |
| 08   | SYBR  | Ctsk   | B      | 21.12 | 4.0789855222543   |                   |
| 09   | SYBR  | Ctsk   | B      | 21.12 | 4.0735478834706   |                   |
| 10   | SYBR  | Ctsk   | C      | 19.38 | 2.3373125878536   | 2.2589468320375   |
| 11   | SYBR  | Ctsk   | C      | 19.27 | 2.2207048941413   |                   |
| 12   | SYBR  | Ctsk   | C      | 19.26 | 2.2188230141177   |                   |
| 13   | SYBR  | Ctsk   | D      | 20.17 | 3.1279284979177   | 3.3217459207751   |
| 14   | SYBR  | Ctsk   | D      | 20.76 | 3.7195994766423   |                   |
| 15   | SYBR  | Ctsk   | D      | 20.16 | 3.1177097877654   |                   |

The original data of PCR

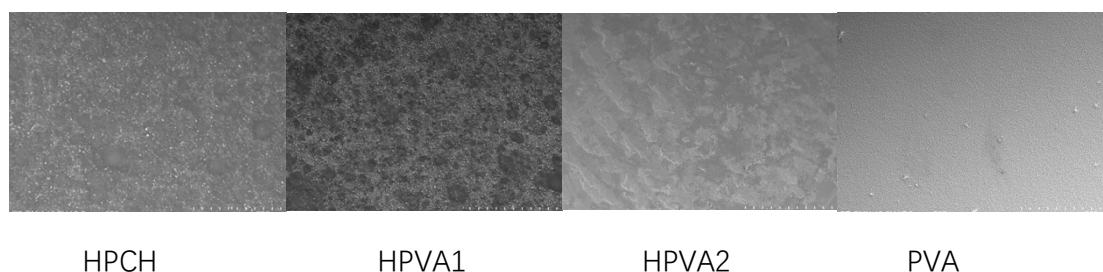

Figure1

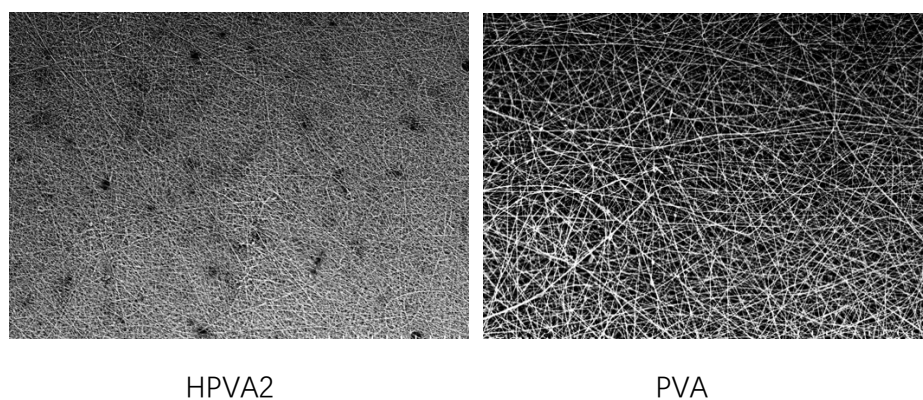

Figure2

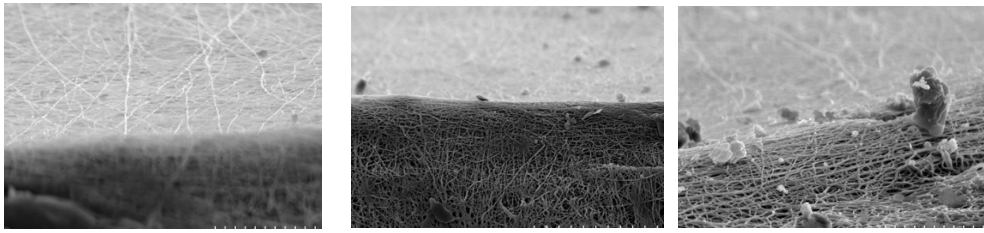

Horizontal section

cross section

45° cross section

Figure 3

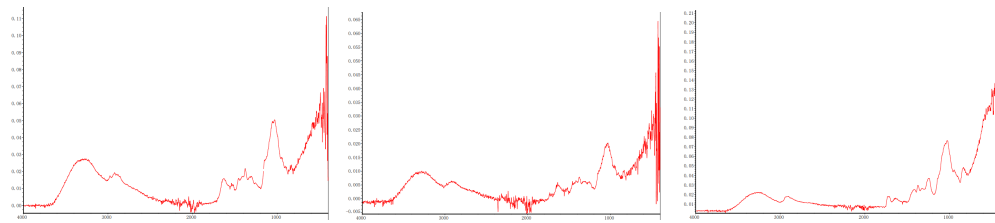

PVA

HPCH

HPVA

Figure 4

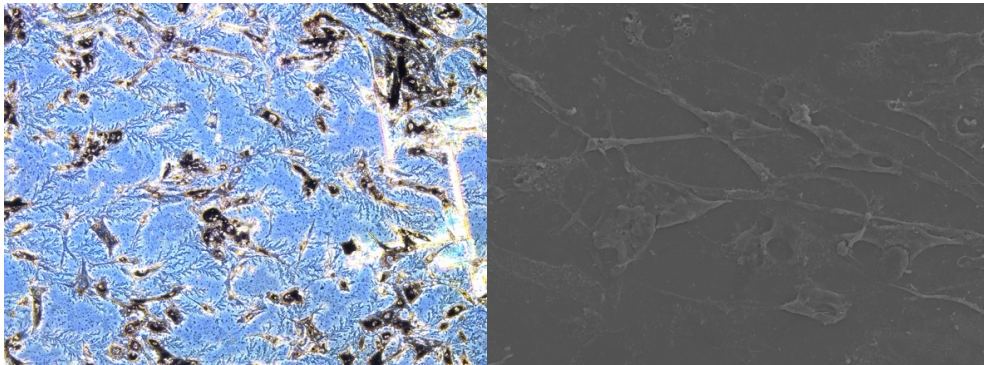

Figure 5

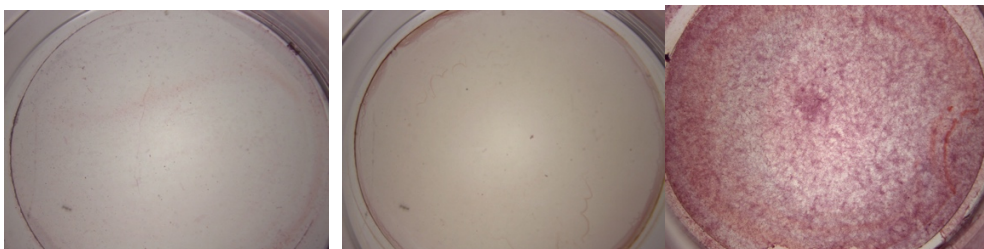

PVA

HCPH

HPVA

Figure6

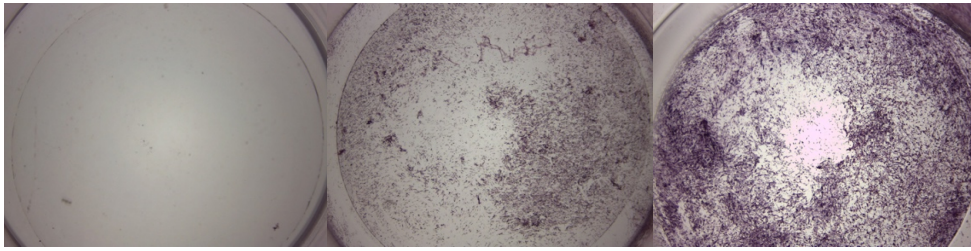

PVA

HCPH

HPVA

Figure 7

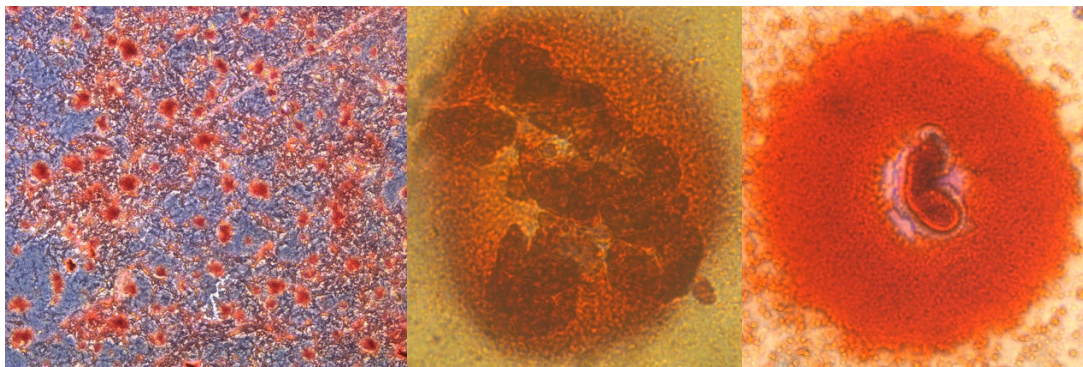

Calcified node

osteoblast

osteocyte

Figure 8 The osteoblast cell on HPVA nanofiber

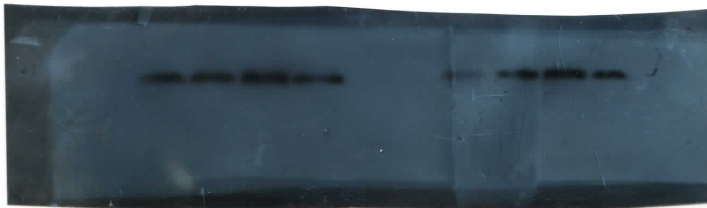

**This is the full-length blot imagine I can afford** (Figure 9. Western blotting of RUNX2)
